# Supplementary material
Source: publisher figshare collection journal article supplement (https://springernature.figshare.com/ndownloader/files/18187283)
Supplement: Supplementary file [file 18187283]

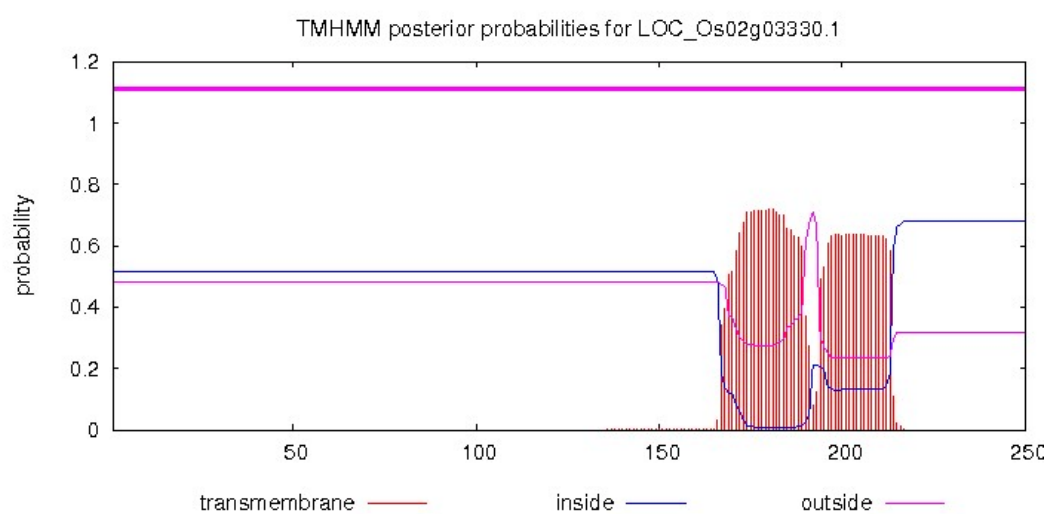

**Additional file 9: Figure S5.** Predicted transmembrane domain of the OsLIL3 (LOC\_Os02g03330) protein.
